# Supplementary material
Source: MDPI journal article supplement (https://www.mdpi.com/1999-4907/13/5/797)
Supplement: s1 [file s1]

## Supplementary Materials

**Table S1.** Physical properties of plantation Japanese larch for ring width and latewood percentage.

| Specimen Number | Latewood Percentage (%) | Ring Width (mm) | Air-dry Density (g/cm <sup>3</sup> ) | Radial Air-dry Shrinkage (%) |
|-----------------|-------------------------|-----------------|--------------------------------------|------------------------------|
| 1               | 31.09                   | 2.85            | 0.460                                | 2.76                         |
| 2               | 12.04                   | 2.22            | 0.393                                | 2.81                         |
| 3               | 25.69                   | 1.32            | 0.432                                | 3.79                         |
| 4               | 26.62                   | 3.96            | 0.436                                | 2.84                         |
| 5               | 12.79                   | 4.04            | 0.406                                | 3.34                         |
| 6               | 27.87                   | 4.95            | 0.436                                | 2.84                         |
| 7               | 25.40                   | 3.25            | 0.459                                | 2.77                         |
| 8               | 15.93                   | 4.48            | 0.378                                | 3.41                         |
| 9               | 27.16                   | 1.99            | 0.400                                | 2.48                         |
| 10              | 29.02                   | 3.95            | 0.444                                | 3.54                         |
| 11              | 28.07                   | 2.85            | 0.439                                | 2.48                         |
| 12              | 20.73                   | 2.83            | 0.374                                | 2.24                         |
| 13              | 16.22                   | 3.97            | 0.414                                | 3.23                         |
| 14              | 27.45                   | 2.81            | 0.477                                | 2.83                         |
| 15              | 25.34                   | 2.84            | 0.439                                | 2.67                         |
| 16              | 12.59                   | 5.01            | 0.410                                | 3.39                         |
| 17              | 32.96                   | 5.49            | 0.453                                | 2.06                         |
| 18              | 24.89                   | 3.35            | 0.366                                | 2.00                         |
| 19              | 26.18                   | 3.30            | 0.424                                | 2.82                         |
| 20              | 35.78                   | 2.84            | 0.466                                | 2.75                         |
| 21              | 13.54                   | 3.92            | 0.448                                | 3.12                         |
| 22              | 19.36                   | 4.05            | 0.428                                | 2.50                         |
| 23              | 21.32                   | 2.66            | 0.385                                | 2.02                         |
| 24              | 27.80                   | 2.21            | 0.401                                | 2.57                         |
| 25              | 31.21                   | 2.85            | 0.484                                | 2.50                         |
| 26              | 22.84                   | 1.98            | 0.446                                | 2.87                         |
| 27              | 15.72                   | 3.99            | 0.393                                | 2.24                         |
| 28              | 32.58                   | 6.58            | 0.444                                | 2.10                         |
| 29              | 36.07                   | 2.84            | 0.442                                | 3.20                         |
| 30              | 21.82                   | 2.87            | 0.372                                | 3.05                         |
| 31              | 11.67                   | 6.69            | 0.352                                | 3.45                         |
| 32              | 20.34                   | 4.51            | 0.445                                | 3.37                         |
| 33              | 25.92                   | 1.09            | 0.428                                | 3.37                         |
| 34              | 24.06                   | 3.05            | 0.437                                | 3.24                         |
| 35              | 26.14                   | 2.10            | 0.429                                | 2.09                         |
| 36              | 30.47                   | 2.72            | 0.425                                | 3.47                         |
| 37              | 26.79                   | 1.99            | 0.401                                | 2.49                         |
| 38              | 25.01                   | 2.77            | 0.398                                | 2.06                         |
| 39              | 32.86                   | 1.98            | 0.448                                | 3.00                         |
| 40              | 33.00                   | 2.84            | 0.463                                | 2.91                         |
| 41              | 22.08                   | 4.04            | 0.412                                | 2.88                         |
| 42              | 27.14                   | 2.49            | 0.389                                | 2.31                         |
| 43              | 20.43                   | 3.32            | 0.441                                | 2.85                         |

|    |       |      |       |      |
|----|-------|------|-------|------|
| 44 | 32.58 | 3.30 | 0.405 | 1.64 |
| 45 | 25.27 | 2.50 | 0.512 | 3.54 |
| 46 | 18.86 | 2.86 | 0.376 | 2.51 |
| 47 | 20.02 | 3.97 | 0.417 | 3.10 |
| 48 | 25.30 | 1.99 | 0.406 | 2.56 |
| 49 | 20.70 | 1.53 | 0.434 | 2.21 |
| 50 | 10.73 | 1.23 | 0.440 | 2.97 |
| 51 | 27.44 | 2.00 | 0.514 | 2.09 |
| 52 | 25.15 | 4.02 | 0.451 | 2.88 |
| 53 | 36.24 | 2.87 | 0.422 | 3.25 |
| 54 | 10.98 | 1.53 | 0.511 | 3.62 |
| 55 | 16.38 | 2.80 | 0.403 | 2.76 |
| 56 | 29.63 | 1.99 | 0.411 | 2.55 |
| 57 | 28.67 | 2.83 | 0.396 | 3.03 |
| 58 | 21.39 | 4.00 | 0.423 | 3.48 |
| 59 | 25.47 | 2.34 | 0.471 | 3.06 |
| 60 | 20.75 | 2.85 | 0.376 | 2.08 |
| 61 | 25.30 | 4.94 | 0.458 | 2.10 |
| 62 | 18.91 | 3.33 | 0.379 | 2.11 |
| 63 | 22.58 | 1.80 | 0.441 | 3.32 |
| 64 | 17.65 | 2.46 | 0.395 | 2.80 |
| 65 | 23.65 | 4.60 | 0.428 | 3.56 |
| 66 | 12.99 | 4.04 | 0.414 | 2.47 |
| 67 | 31.48 | 3.32 | 0.438 | 2.67 |
| 68 | 22.64 | 3.98 | 0.464 | 2.42 |
| 69 | 16.92 | 3.98 | 0.401 | 2.43 |
| 70 | 28.39 | 3.29 | 0.430 | 2.92 |
| 71 | 18.02 | 4.03 | 0.412 | 3.65 |
| 72 | 28.23 | 2.84 | 0.397 | 2.65 |
| 73 | 22.09 | 3.98 | 0.416 | 2.26 |
| 74 | 33.42 | 3.34 | 0.465 | 2.51 |
| 75 | 22.19 | 3.99 | 0.428 | 2.51 |
| 76 | 23.44 | 2.21 | 0.401 | 2.48 |
| 77 | 28.28 | 3.08 | 0.435 | 2.64 |
| 78 | 12.51 | 3.98 | 0.381 | 2.54 |
| 79 | 28.07 | 2.84 | 0.397 | 2.89 |
| 80 | 20.17 | 2.79 | 0.420 | 3.12 |
| 81 | 34.42 | 2.79 | 0.454 | 3.77 |
| 82 | 25.17 | 2.78 | 0.412 | 4.63 |
| 83 | 12.85 | 3.96 | 0.395 | 2.44 |
| 84 | 21.65 | 1.73 | 0.454 | 3.20 |
| 85 | 20.73 | 5.75 | 0.454 | 3.36 |
| 86 | 29.33 | 2.84 | 0.376 | 1.94 |
| 87 | 24.43 | 1.81 | 0.426 | 2.40 |
| 88 | 25.99 | 1.98 | 0.448 | 2.82 |
| 89 | 18.71 | 5.95 | 0.430 | 3.26 |
| 90 | 15.00 | 4.95 | 0.374 | 2.61 |
| 91 | 16.38 | 4.00 | 0.433 | 2.38 |
| 92 | 29.29 | 3.33 | 0.432 | 2.66 |

|     |       |      |       |      |
|-----|-------|------|-------|------|
| 93  | 22.96 | 3.93 | 0.433 | 3.58 |
| 94  | 21.32 | 3.95 | 0.426 | 2.29 |
| 95  | 16.55 | 2.82 | 0.402 | 2.74 |
| 96  | 34.65 | 2.54 | 0.430 | 2.53 |
| 97  | 25.92 | 2.21 | 0.512 | 2.30 |
| 98  | 22.53 | 2.83 | 0.443 | 2.84 |
| 99  | 18.98 | 3.96 | 0.443 | 2.84 |
| 100 | 19.47 | 2.65 | 0.435 | 2.53 |
| 101 | 15.05 | 3.32 | 0.368 | 2.60 |
| 102 | 20.72 | 2.45 | 0.459 | 2.95 |
| 103 | 15.74 | 3.04 | 0.388 | 2.86 |
| 104 | 24.58 | 3.94 | 0.447 | 2.79 |
| 105 | 41.99 | 2.85 | 0.465 | 3.04 |
| 106 | 24.90 | 1.81 | 0.490 | 3.19 |
| 107 | 22.11 | 2.50 | 0.430 | 2.68 |
| 108 | 23.81 | 3.33 | 0.375 | 2.71 |
| 109 | 17.49 | 3.95 | 0.423 | 3.48 |

**Table S2.** Physical properties of plantation Japanese larch for ring width.

| Ring Width Class | Air-dry Density (g/cm <sup>3</sup> ) | CV (%) | Radial Air-dry Shrinkage (%) | CV (%) |
|------------------|--------------------------------------|--------|------------------------------|--------|
| W1               | 0.439                                | 8.53   | 2.78                         | 17.29  |
| W 2              | 0.426                                | 8.17   | 2.82                         | 17.45  |
| W 3              | 0.419                                | 6.21   | 2.73                         | 17.74  |
| W 4              | 0.419                                | 7.76   | 3.04                         | 17.74  |
| W 5              | 0.427                                | 10.01  | 2.85                         | 24.74  |

**Table S3.** Physical properties of plantation Japanese larch for latewood percentage.

| Latewood Percentage Class | Air-dry Density (g/cm <sup>3</sup> ) | CV (%) | Radial Air-dry Shrinkage (%) | CV (%) |
|---------------------------|--------------------------------------|--------|------------------------------|--------|
| L1                        | 0.405                                | 8.47   | 2.87058                      | 14.63  |
| L2                        | 0.419                                | 6.62   | 2.83075                      | 17.41  |
| L3                        | 0.425                                | 7.21   | 2.80586                      | 17.07  |
| L4                        | 0.436                                | 8.20   | 2.77602                      | 19.65  |
| L5                        | 0.441                                | 5.68   | 2.74198                      | 20.17  |

**Table S4.** The results of fits of physical properties of plantation Japanese larch to ring width (w) and latewood percentage (l).

| Properties          | Formula                         | R <sup>2</sup> |
|---------------------|---------------------------------|----------------|
| Latewood Percentage | $y = 0.002d + 0.379$            | 0.97           |
|                     | $y = -0.007s + 2.966$           | 0.99           |
|                     | $y = 0.003s^2 - 0.028s + 0.480$ | 0.99           |

d: air-dry density (g/cm<sup>3</sup>); s: radial air-dry shrinkage (%).

**Table S5.** The modulus of elasticity of plantation Japanese larch for ring width and latewood percentage.

| Specimen Number | Latewood Percentage (%) | Ring Width (mm) | The Modulus of Elasticity (MPa) |
|-----------------|-------------------------|-----------------|---------------------------------|
| 1               | 17.19                   | 4.00            | 12.92                           |
| 2               | 16.50                   | 3.33            | 12.11                           |
| 3               | 28.68                   | 3.02            | 14.00                           |
| 4               | 28.54                   | 2.64            | 11.40                           |
| 5               | 24.35                   | 2.51            | 11.68                           |
| 6               | 15.06                   | 4.98            | 11.61                           |
| 7               | 30.70                   | 3.35            | 13.35                           |
| 8               | 32.41                   | 2.22            | 10.56                           |
| 9               | 34.09                   | 2.86            | 10.24                           |
| 10              | 33.13                   | 2.78            | 8.97                            |
| 11              | 39.17                   | 3.07            | 10.69                           |
| 12              | 17.34                   | 3.95            | 11.83                           |
| 13              | 32.51                   | 2.34            | 10.02                           |
| 14              | 25.00                   | 3.34            | 11.67                           |
| 15              | 34.10                   | 3.61            | 18.33                           |
| 16              | 33.14                   | 3.32            | 16.05                           |
| 17              | 34.61                   | 2.66            | 11.96                           |
| 18              | 36.23                   | 3.33            | 7.26                            |
| 19              | 32.15                   | 3.29            | 8.92                            |
| 20              | 4.37                    | 2.47            | 10.17                           |
| 21              | 39.84                   | 2.48            | 13.02                           |
| 22              | 23.64                   | 3.81            | 13.21                           |
| 23              | 13.97                   | 5.36            | 9.88                            |
| 24              | 18.68                   | 5.01            | 12.20                           |
| 25              | 27.76                   | 2.56            | 10.34                           |
| 26              | 22.87                   | 2.44            | 14.62                           |
| 27              | 25.26                   | 2.62            | 9.63                            |
| 28              | 22.04                   | 2.49            | 11.54                           |
| 29              | 23.14                   | 2.34            | 12.78                           |
| 30              | 29.64                   | 2.21            | 13.02                           |
| 31              | 28.73                   | 1.97            | 13.11                           |
| 32              | 29.86                   | 2.24            | 13.81                           |
| 33              | 23.59                   | 2.09            | 12.40                           |
| 34              | 28.65                   | 3.29            | 13.21                           |
| 35              | 20.84                   | 3.97            | 11.61                           |
| 36              | 22.87                   | 2.45            | 11.46                           |
| 37              | 13.85                   | 3.63            | 12.43                           |
| 38              | 23.50                   | 2.84            | 10.00                           |

|    |       |      |       |
|----|-------|------|-------|
| 39 | 29.59 | 4.99 | 11.65 |
| 40 | 26.43 | 2.73 | 12.62 |
| 41 | 20.40 | 3.82 | 11.43 |
| 42 | 23.90 | 2.49 | 7.70  |
| 43 | 23.55 | 3.31 | 13.23 |
| 44 | 18.89 | 2.01 | 11.17 |
| 45 | 21.42 | 2.19 | 13.08 |
| 46 | 21.13 | 2.76 | 12.65 |
| 47 | 27.19 | 2.85 | 13.64 |
| 48 | 20.94 | 2.10 | 12.48 |
| 49 | 22.85 | 3.66 | 14.02 |
| 50 | 22.54 | 4.98 | 10.68 |
| 51 | 22.82 | 3.32 | 10.68 |
| 52 | 23.97 | 3.99 | 12.39 |
| 53 | 25.83 | 3.31 | 9.71  |
| 54 | 20.87 | 3.97 | 13.86 |
| 55 | 22.15 | 4.96 | 13.86 |
| 56 | 17.25 | 3.94 | 12.32 |
| 57 | 13.28 | 3.31 | 11.66 |
| 58 | 24.36 | 4.47 | 13.99 |
| 59 | 23.16 | 2.84 | 9.36  |
| 60 | 16.52 | 3.97 | 12.58 |
| 61 | 30.70 | 4.04 | 15.27 |
| 62 | 21.68 | 4.03 | 12.98 |
| 63 | 14.43 | 3.96 | 15.07 |
| 64 | 21.74 | 4.94 | 13.94 |
| 65 | 24.47 | 3.97 | 10.57 |
| 66 | 24.61 | 1.41 | 15.81 |
| 67 | 23.10 | 4.43 | 11.13 |
| 68 | 24.69 | 3.35 | 10.03 |
| 69 | 22.06 | 3.94 | 13.00 |
| 70 | 24.54 | 3.29 | 14.82 |
| 71 | 24.57 | 3.96 | 15.93 |
| 72 | 14.17 | 4.93 | 14.11 |
| 73 | 14.19 | 6.68 | 7.72  |
| 74 | 19.39 | 4.45 | 7.72  |
| 75 | 16.31 | 2.47 | 10.03 |
| 76 | 14.71 | 3.62 | 10.04 |
| 77 | 17.33 | 3.34 | 13.40 |
| 78 | 12.06 | 2.87 | 8.94  |
| 79 | 15.22 | 4.94 | 8.28  |
| 80 | 18.35 | 2.81 | 11.98 |
| 81 | 18.90 | 3.34 | 10.91 |

|     |       |      |       |
|-----|-------|------|-------|
| 82  | 9.74  | 4.99 | 9.44  |
| 83  | 18.88 | 3.32 | 13.23 |
| 84  | 12.03 | 2.84 | 10.48 |
| 85  | 21.81 | 4.00 | 9.68  |
| 86  | 20.22 | 2.68 | 15.52 |
| 87  | 15.95 | 4.00 | 11.73 |
| 88  | 12.31 | 4.63 | 10.00 |
| 89  | 12.97 | 4.98 | 11.69 |
| 90  | 25.11 | 4.02 | 12.79 |
| 91  | 16.99 | 5.94 | 9.66  |
| 92  | 18.08 | 4.01 | 15.86 |
| 93  | 22.29 | 3.34 | 12.87 |
| 94  | 22.23 | 3.73 | 14.11 |
| 95  | 20.68 | 3.94 | 14.75 |
| 96  | 27.86 | 4.03 | 14.10 |
| 97  | 20.24 | 3.35 | 11.40 |
| 98  | 6.61  | 6.72 | 11.16 |
| 99  | 13.30 | 4.20 | 11.42 |
| 100 | 14.74 | 3.98 | 10.69 |
| 101 | 12.23 | 4.04 | 12.37 |
| 102 | 17.65 | 3.95 | 10.28 |
| 103 | 23.21 | 2.78 | 13.83 |
| 104 | 17.50 | 2.90 | 14.25 |
| 105 | 23.54 | 1.89 | 14.20 |
| 106 | 22.54 | 2.02 | 12.89 |
| 107 | 16.31 | 2.44 | 14.42 |
| 108 | 21.41 | 1.72 | 14.58 |
| 109 | 23.31 | 1.65 | 14.79 |
| 110 | 22.31 | 1.65 | 11.47 |
| 111 | 17.25 | 3.29 | 14.41 |
| 112 | 5.21  | 6.58 | 7.33  |
| 113 | 8.15  | 5.62 | 9.94  |
| 114 | 14.86 | 4.05 | 11.14 |
| 115 | 11.30 | 4.80 | 11.03 |
| 116 | 12.95 | 4.97 | 10.56 |
| 117 | 10.78 | 4.61 | 17.67 |
| 118 | 15.05 | 3.30 | 13.12 |
| 119 | 11.31 | 3.09 | 12.20 |
| 120 | 25.76 | 1.25 | 13.04 |
| 121 | 26.52 | 1.06 | 15.88 |
| 122 | 18.92 | 3.10 | 13.38 |
| 123 | 13.51 | 5.01 | 6.71  |
| 124 | 23.29 | 1.49 | 13.27 |

|     |       |      |       |
|-----|-------|------|-------|
| 125 | 25.76 | 1.42 | 16.04 |
| 126 | 24.41 | 1.45 | 9.77  |
| 127 | 21.01 | 1.53 | 15.11 |
| 128 | 28.00 | 2.22 | 15.39 |
| 129 | 28.32 | 1.52 | 10.41 |
| 130 | 23.58 | 1.71 | 12.14 |
| 131 | 27.65 | 2.26 | 10.21 |
| 132 | 24.72 | 1.98 | 13.79 |
| 133 | 23.23 | 2.17 | 15.39 |
| 134 | 29.65 | 2.53 | 13.86 |
| 135 | 24.27 | 1.90 | 15.83 |
| 136 | 25.42 | 2.12 | 15.07 |
| 137 | 20.45 | 1.94 | 14.47 |
| 138 | 13.30 | 6.63 | 11.36 |
| 139 | 21.09 | 4.00 | 9.37  |
| 140 | 21.37 | 1.98 | 10.43 |
| 141 | 19.97 | 4.01 | 12.49 |
| 142 | 22.39 | 2.23 | 14.38 |
| 143 | 18.61 | 3.26 | 14.49 |
| 144 | 26.16 | 1.24 | 16.36 |
| 145 | 26.28 | 2.22 | 11.19 |
| 146 | 6.84  | 6.59 | 6.96  |
| 147 | 14.92 | 3.37 | 11.28 |
| 148 | 11.85 | 2.85 | 7.43  |
| 149 | 23.94 | 1.24 | 15.82 |
| 150 | 22.84 | 1.79 | 16.37 |
| 151 | 8.67  | 4.97 | 7.06  |
| 152 | 16.76 | 3.72 | 10.62 |
| 153 | 15.59 | 1.98 | 11.17 |
| 154 | 12.20 | 4.96 | 7.03  |
| 155 | 20.93 | 2.16 | 10.55 |
| 156 | 19.30 | 3.93 | 9.78  |
| 157 | 20.74 | 1.83 | 12.52 |
| 158 | 22.66 | 1.52 | 15.65 |
| 159 | 21.79 | 2.65 | 10.35 |
| 160 | 28.86 | 1.80 | 9.77  |
| 161 | 21.56 | 1.99 | 8.32  |
| 162 | 19.35 | 3.96 | 9.00  |
| 163 | 19.13 | 2.71 | 10.49 |
| 164 | 11.39 | 5.31 | 7.74  |
| 165 | 13.47 | 3.27 | 7.74  |
| 166 | 27.31 | 1.09 | 7.74  |
| 167 | 8.23  | 6.19 | 7.19  |

|     |       |      |       |
|-----|-------|------|-------|
| 168 | 19.33 | 2.30 | 11.73 |
| 169 | 14.65 | 2.20 | 10.36 |
| 170 | 15.52 | 3.07 | 11.10 |
| 171 | 11.51 | 3.09 | 6.73  |
| 172 | 17.23 | 3.51 | 7.51  |
| 173 | 22.13 | 2.53 | 9.55  |
| 174 | 12.76 | 3.68 | 8.57  |
| 175 | 7.46  | 5.86 | 8.20  |
| 176 | 20.18 | 3.33 | 9.58  |
| 177 | 26.10 | 1.37 | 12.31 |
| 178 | 24.94 | 1.53 | 13.35 |
| 179 | 18.89 | 3.68 | 11.32 |
| 180 | 23.02 | 1.81 | 11.05 |
| 181 | 30.60 | 2.13 | 14.36 |
| 182 | 27.90 | 1.69 | 13.94 |
| 183 | 26.14 | 1.58 | 11.84 |
| 184 | 33.20 | 2.47 | 11.84 |
| 185 | 23.54 | 3.07 | 13.74 |
| 186 | 20.05 | 1.90 | 12.57 |
| 187 | 20.85 | 3.07 | 8.79  |
| 188 | 21.81 | 2.23 | 9.94  |
| 189 | 16.33 | 3.03 | 10.85 |
| 190 | 17.03 | 3.60 | 9.43  |
| 191 | 22.07 | 2.84 | 12.80 |
| 192 | 18.76 | 3.30 | 10.96 |
| 193 | 26.86 | 1.99 | 12.16 |
| 194 | 15.09 | 3.96 | 6.88  |
| 195 | 22.82 | 2.23 | 9.24  |
| 196 | 16.80 | 3.32 | 12.30 |

**Table S6.** The modulus of rupture of plantation Japanese larch for ring width and latewood percentage.

| Specimen Number | Latewood Percentage (%) | Ring Width (mm) | The Modulus of Rupture (MPa) |
|-----------------|-------------------------|-----------------|------------------------------|
| 1               | 17.19                   | 4.00            | 80.04                        |
| 2               | 16.50                   | 3.33            | 93.13                        |
| 3               | 28.68                   | 3.02            | 95.86                        |
| 4               | 28.54                   | 2.64            | 75.52                        |
| 5               | 17.34                   | 3.95            | 81.81                        |
| 6               | 32.51                   | 2.34            | 82.97                        |
| 7               | 25.00                   | 3.34            | 98.35                        |
| 8               | 33.14                   | 3.32            | 99.63                        |



|    |       |      |        |
|----|-------|------|--------|
| 9  | 34.61 | 2.66 | 89.38  |
| 10 | 32.15 | 3.29 | 91.95  |
| 11 | 4.37  | 2.47 | 88.12  |
| 12 | 39.84 | 2.48 | 96.70  |
| 13 | 23.64 | 3.81 | 71.91  |
| 14 | 13.97 | 5.36 | 73.82  |
| 15 | 18.68 | 5.01 | 77.66  |
| 16 | 27.76 | 2.56 | 92.17  |
| 17 | 22.87 | 2.44 | 99.89  |
| 18 | 25.26 | 2.62 | 82.80  |
| 19 | 22.04 | 2.49 | 91.61  |
| 20 | 23.59 | 2.09 | 93.59  |
| 21 | 23.50 | 2.84 | 84.38  |
| 22 | 29.59 | 4.99 | 85.46  |
| 23 | 26.43 | 2.73 | 74.34  |
| 24 | 20.40 | 3.82 | 78.11  |
| 25 | 23.90 | 2.49 | 38.47  |
| 26 | 21.13 | 2.76 | 92.78  |
| 27 | 27.19 | 2.85 | 91.96  |
| 28 | 20.94 | 2.10 | 88.96  |
| 29 | 23.97 | 3.99 | 84.01  |
| 30 | 25.83 | 3.31 | 70.02  |
| 31 | 20.87 | 3.97 | 79.44  |
| 32 | 22.15 | 4.96 | 79.44  |
| 33 | 17.25 | 3.94 | 83.08  |
| 34 | 13.28 | 3.31 | 78.34  |
| 35 | 30.70 | 4.04 | 99.71  |
| 36 | 21.74 | 4.94 | 97.76  |
| 37 | 24.61 | 1.41 | 95.78  |
| 38 | 23.10 | 4.43 | 82.96  |
| 39 | 22.06 | 3.94 | 97.98  |
| 40 | 24.54 | 3.29 | 91.85  |
| 41 | 16.31 | 2.47 | 74.26  |
| 42 | 17.33 | 3.34 | 88.98  |
| 43 | 12.06 | 2.87 | 67.62  |
| 44 | 20.22 | 2.68 | 102.24 |
| 45 | 12.31 | 4.63 | 64.30  |
| 46 | 12.97 | 4.98 | 84.89  |
| 47 | 25.11 | 4.02 | 95.16  |
| 48 | 16.99 | 5.94 | 71.17  |
| 49 | 18.08 | 4.01 | 104.03 |
| 50 | 20.24 | 3.35 | 77.15  |
| 51 | 6.61  | 6.72 | 80.37  |

|    |       |      |        |
|----|-------|------|--------|
| 52 | 13.30 | 4.20 | 65.11  |
| 53 | 14.74 | 3.98 | 80.67  |
| 54 | 12.23 | 4.04 | 80.41  |
| 55 | 17.50 | 2.90 | 105.94 |
| 56 | 23.54 | 1.89 | 86.86  |
| 57 | 21.41 | 1.72 | 89.78  |
| 58 | 23.31 | 1.65 | 101.39 |
| 59 | 17.25 | 3.29 | 98.78  |
| 60 | 5.21  | 6.58 | 48.57  |
| 61 | 8.15  | 5.62 | 64.58  |
| 62 | 14.86 | 4.05 | 73.60  |
| 63 | 11.30 | 4.80 | 74.91  |
| 64 | 12.95 | 4.97 | 71.45  |
| 65 | 10.78 | 4.61 | 189.01 |
| 66 | 15.05 | 3.30 | 77.87  |
| 67 | 11.31 | 3.09 | 75.97  |
| 68 | 24.41 | 1.45 | 93.27  |
| 69 | 21.01 | 1.53 | 106.88 |
| 70 | 23.58 | 1.71 | 110.99 |
| 71 | 24.27 | 1.90 | 107.76 |
| 72 | 25.42 | 2.12 | 115.92 |
| 73 | 20.45 | 1.94 | 96.09  |
| 74 | 21.09 | 4.00 | 72.22  |
| 75 | 21.37 | 1.98 | 90.44  |
| 76 | 22.39 | 2.23 | 104.60 |
| 77 | 18.61 | 3.26 | 104.91 |
| 78 | 26.16 | 1.24 | 117.16 |
| 79 | 6.84  | 6.59 | 64.12  |
| 80 | 11.85 | 2.85 | 65.27  |
| 81 | 22.84 | 1.79 | 110.69 |
| 82 | 8.67  | 4.97 | 60.14  |
| 83 | 16.76 | 3.72 | 86.69  |
| 84 | 12.20 | 4.96 | 65.76  |
| 85 | 20.93 | 2.16 | 74.29  |
| 86 | 19.30 | 3.93 | 91.87  |
| 87 | 19.13 | 2.71 | 76.51  |
| 88 | 11.39 | 5.31 | 64.69  |
| 89 | 13.47 | 3.27 | 64.69  |
| 90 | 27.31 | 1.09 | 64.69  |
| 91 | 19.33 | 2.30 | 82.71  |
| 92 | 14.65 | 2.20 | 76.33  |
| 93 | 15.52 | 3.07 | 74.81  |
| 94 | 12.76 | 3.68 | 63.49  |

|     |       |      |       |
|-----|-------|------|-------|
| 95  | 7.46  | 5.86 | 53.51 |
| 96  | 20.18 | 3.33 | 83.16 |
| 97  | 24.94 | 1.53 | 83.81 |
| 98  | 30.60 | 2.13 | 96.93 |
| 99  | 26.14 | 1.58 | 87.85 |
| 100 | 33.20 | 2.47 | 87.85 |
| 101 | 20.05 | 1.90 | 90.96 |
| 102 | 20.85 | 3.07 | 66.17 |
| 103 | 21.81 | 2.23 | 78.22 |
| 104 | 16.33 | 3.03 | 70.20 |
| 105 | 22.82 | 2.23 | 80.44 |

**Table S7.** The ultimate tensile stress of plantation Japanese larch for ring width and latewood percentage.

| Specimen Number | Latewood Percentage (%) | Ring Width (mm) | The Ultimate Tensile Stress (MPa) |
|-----------------|-------------------------|-----------------|-----------------------------------|
| 1               | 20.97                   | 3.34            | 92.15                             |
| 2               | 17.64                   | 4.01            | 86.63                             |
| 3               | 11.53                   | 3.93            | 144.32                            |
| 4               | 21.48                   | 4.98            | 115.21                            |
| 5               | 23.41                   | 2.22            | 101.78                            |
| 6               | 18.01                   | 2.74            | 87.65                             |
| 7               | 22.12                   | 3.27            | 89.83                             |
| 8               | 28.17                   | 2.20            | 76.92                             |
| 9               | 23.34                   | 4.01            | 96.02                             |
| 10              | 21.65                   | 1.98            | 49.17                             |
| 11              | 16.64                   | 3.95            | 99.22                             |
| 12              | 25.18                   | 2.14            | 157.77                            |
| 13              | 20.15                   | 3.07            | 123.76                            |
| 14              | 18.70                   | 2.53            | 137.73                            |
| 15              | 18.44                   | 3.16            | 71.95                             |
| 16              | 9.23                    | 4.96            | 106.40                            |
| 17              | 10.22                   | 4.01            | 86.01                             |
| 18              | 26.51                   | 2.47            | 128.09                            |
| 19              | 23.05                   | 2.44            | 150.45                            |
| 20              | 19.55                   | 2.46            | 84.67                             |
| 21              | 17.98                   | 3.32            | 140.73                            |
| 22              | 23.32                   | 1.81            | 138.41                            |
| 23              | 23.44                   | 2.49            | 134.53                            |
| 24              | 25.11                   | 3.29            | 115.75                            |
| 25              | 18.81                   | 3.02            | 103.86                            |
| 26              | 21.95                   | 2.85            | 130.41                            |
| 27              | 22.47                   | 3.61            | 91.99                             |

|    |       |      |        |
|----|-------|------|--------|
| 28 | 24.47 | 3.31 | 91.99  |
| 29 | 15.46 | 2.21 | 97.51  |
| 30 | 19.92 | 2.51 | 104.79 |
| 31 | 20.98 | 2.52 | 120.96 |
| 32 | 16.53 | 1.81 | 73.16  |
| 33 | 19.23 | 3.35 | 109.32 |
| 34 | 24.42 | 3.98 | 118.57 |
| 35 | 12.26 | 3.99 | 103.67 |
| 36 | 16.78 | 4.96 | 40.41  |
| 37 | 15.20 | 3.97 | 117.43 |
| 38 | 18.83 | 3.94 | 119.93 |
| 39 | 11.26 | 3.98 | 106.09 |
| 40 | 19.91 | 4.03 | 86.40  |
| 41 | 13.30 | 3.32 | 95.09  |
| 42 | 21.78 | 3.97 | 104.87 |
| 43 | 13.09 | 4.04 | 66.10  |
| 44 | 19.53 | 3.96 | 64.59  |
| 45 | 24.12 | 4.94 | 58.94  |
| 46 | 25.46 | 3.29 | 157.56 |
| 47 | 28.24 | 3.95 | 126.57 |
| 48 | 21.39 | 3.97 | 104.25 |
| 49 | 27.59 | 4.93 | 80.66  |
| 50 | 23.32 | 4.99 | 161.14 |
| 51 | 23.23 | 4.93 | 118.45 |
| 52 | 22.40 | 3.29 | 153.33 |
| 53 | 19.04 | 3.96 | 88.13  |
| 54 | 23.08 | 3.29 | 82.96  |
| 55 | 21.58 | 2.91 | 60.70  |
| 56 | 18.59 | 2.84 | 38.74  |
| 57 | 23.53 | 2.35 | 88.63  |
| 58 | 20.76 | 2.87 | 83.10  |
| 59 | 23.21 | 3.29 | 97.30  |
| 60 | 19.32 | 3.28 | 66.18  |
| 61 | 15.07 | 4.00 | 85.99  |
| 62 | 24.15 | 3.02 | 149.98 |
| 63 | 18.67 | 3.32 | 71.14  |
| 64 | 22.01 | 2.84 | 83.48  |
| 65 | 17.80 | 3.34 | 102.98 |
| 66 | 23.36 | 4.02 | 130.13 |
| 67 | 26.43 | 4.36 | 143.21 |
| 68 | 19.62 | 3.04 | 104.73 |
| 69 | 22.58 | 3.36 | 91.96  |
| 70 | 24.18 | 3.29 | 82.12  |

|     |       |      |        |
|-----|-------|------|--------|
| 71  | 5.93  | 6.72 | 171.24 |
| 72  | 15.81 | 6.73 | 74.63  |
| 73  | 21.91 | 2.82 | 143.69 |
| 74  | 22.56 | 2.14 | 149.23 |
| 75  | 8.75  | 6.54 | 105.94 |
| 76  | 18.30 | 3.61 | 98.58  |
| 77  | 16.73 | 4.82 | 94.13  |
| 78  | 23.16 | 1.76 | 120.07 |
| 79  | 15.72 | 1.72 | 74.19  |
| 80  | 16.25 | 1.72 | 117.47 |
| 81  | 18.38 | 1.89 | 142.78 |
| 82  | 8.63  | 3.93 | 74.86  |
| 83  | 14.13 | 2.08 | 87.15  |
| 84  | 20.45 | 1.47 | 94.66  |
| 85  | 30.65 | 1.70 | 173.46 |
| 86  | 10.26 | 5.28 | 117.28 |
| 87  | 17.22 | 2.20 | 154.30 |
| 88  | 23.55 | 1.52 | 154.30 |
| 89  | 26.84 | 1.42 | 104.19 |
| 90  | 31.51 | 2.20 | 126.34 |
| 91  | 25.97 | 1.99 | 160.17 |
| 92  | 14.48 | 4.95 | 88.70  |
| 93  | 33.67 | 2.24 | 194.02 |
| 94  | 29.81 | 2.89 | 107.43 |
| 95  | 21.47 | 4.94 | 134.76 |
| 96  | 28.56 | 2.51 | 102.18 |
| 97  | 18.72 | 3.67 | 61.01  |
| 98  | 18.88 | 2.84 | 144.27 |
| 99  | 11.75 | 3.31 | 81.77  |
| 100 | 19.46 | 2.00 | 130.47 |
| 101 | 12.21 | 3.95 | 78.27  |
| 102 | 11.97 | 2.98 | 60.23  |
| 103 | 26.81 | 1.66 | 85.04  |
| 104 | 19.54 | 1.74 | 113.40 |
| 105 | 24.28 | 1.66 | 150.20 |
| 106 | 13.15 | 5.97 | 65.02  |
| 107 | 20.49 | 1.80 | 139.74 |
| 108 | 14.98 | 1.24 | 116.59 |
| 109 | 21.27 | 1.77 | 122.49 |
| 110 | 23.49 | 3.03 | 79.70  |
| 111 | 20.41 | 3.31 | 79.38  |
| 112 | 20.20 | 2.39 | 67.13  |
| 113 | 21.75 | 3.60 | 67.13  |

|     |       |      |        |
|-----|-------|------|--------|
| 114 | 18.90 | 2.68 | 71.19  |
| 115 | 17.02 | 2.87 | 71.19  |
| 116 | 21.10 | 2.18 | 51.26  |
| 117 | 21.27 | 2.80 | 51.26  |
| 118 | 15.24 | 2.83 | 99.34  |
| 119 | 13.50 | 2.77 | 64.60  |
| 120 | 13.18 | 3.97 | 92.27  |
| 121 | 12.78 | 5.69 | 72.12  |
| 122 | 15.87 | 3.35 | 79.60  |
| 123 | 19.13 | 2.85 | 97.82  |
| 124 | 20.93 | 1.81 | 99.20  |
| 125 | 25.49 | 1.80 | 131.56 |
| 126 | 35.78 | 1.66 | 145.86 |
| 127 | 13.45 | 3.32 | 59.66  |
| 128 | 16.05 | 3.30 | 115.90 |
| 129 | 19.15 | 3.31 | 73.39  |
| 130 | 24.08 | 2.09 | 127.65 |
| 131 | 13.44 | 3.98 | 86.13  |

**Table S8.** The impact bending strength of plantation Japanese larch for ring width and latewood percentage.

| Specimen Number | Latewood Percentage (%) | Ring Width (mm) | The Impact Bending Strength (kJ/m <sup>2</sup> ) |
|-----------------|-------------------------|-----------------|--------------------------------------------------|
| 1               | 24.35                   | 2.51            | 39.95                                            |
| 2               | 15.06                   | 4.98            | 36.64                                            |
| 3               | 30.70                   | 3.35            | 41.94                                            |
| 4               | 32.41                   | 2.22            | 54.24                                            |
| 5               | 39.17                   | 3.07            | 30.25                                            |
| 6               | 23.14                   | 2.34            | 46.61                                            |
| 7               | 29.64                   | 2.21            | 65.94                                            |
| 8               | 28.73                   | 1.97            | 54.23                                            |
| 9               | 29.86                   | 2.24            | 64.03                                            |
| 10              | 28.65                   | 3.29            | 53.80                                            |
| 11              | 20.84                   | 3.97            | 44.28                                            |
| 12              | 22.87                   | 2.45            | 46.42                                            |
| 13              | 13.85                   | 3.63            | 48.31                                            |
| 14              | 23.55                   | 3.31            | 52.03                                            |
| 15              | 18.89                   | 2.01            | 38.36                                            |
| 16              | 21.42                   | 2.19            | 39.15                                            |
| 17              | 22.85                   | 3.66            | 57.55                                            |
| 18              | 22.54                   | 4.98            | 34.53                                            |
| 19              | 22.82                   | 3.32            | 34.53                                            |

|    |       |      |        |
|----|-------|------|--------|
| 20 | 24.36 | 4.47 | 48.91  |
| 21 | 23.16 | 2.84 | 29.00  |
| 22 | 16.52 | 3.97 | 63.01  |
| 23 | 21.68 | 4.03 | 44.45  |
| 24 | 14.43 | 3.96 | 117.61 |
| 25 | 24.47 | 3.97 | 38.49  |
| 26 | 24.69 | 3.35 | 34.65  |
| 27 | 24.57 | 3.96 | 134.71 |
| 28 | 14.17 | 4.93 | 26.82  |
| 29 | 14.19 | 6.68 | 81.14  |
| 30 | 19.39 | 4.45 | 81.14  |
| 31 | 14.71 | 3.62 | 41.31  |
| 32 | 15.22 | 4.94 | 22.60  |
| 33 | 18.90 | 3.34 | 37.35  |
| 34 | 9.74  | 4.99 | 22.21  |
| 35 | 12.03 | 2.84 | 34.38  |
| 36 | 21.81 | 4.00 | 28.31  |
| 37 | 15.95 | 4.00 | 29.44  |
| 38 | 22.29 | 3.34 | 42.42  |
| 39 | 22.23 | 3.73 | 71.13  |
| 40 | 20.68 | 3.94 | 55.50  |
| 41 | 27.86 | 4.03 | 69.55  |
| 42 | 17.65 | 3.95 | 42.40  |
| 43 | 23.21 | 2.78 | 64.74  |
| 44 | 22.54 | 2.02 | 54.51  |
| 45 | 16.31 | 2.44 | 41.19  |
| 46 | 22.31 | 1.65 | 42.38  |
| 47 | 25.76 | 1.25 | 59.46  |
| 48 | 26.52 | 1.06 | 70.89  |
| 49 | 13.51 | 5.01 | 28.82  |
| 50 | 23.29 | 1.49 | 56.23  |
| 51 | 25.76 | 1.42 | 74.48  |
| 52 | 28.00 | 2.22 | 43.42  |
| 53 | 28.32 | 1.52 | 59.01  |
| 54 | 27.65 | 2.26 | 35.01  |
| 55 | 24.72 | 1.98 | 83.44  |
| 56 | 23.23 | 2.17 | 62.74  |
| 57 | 29.65 | 2.53 | 59.92  |
| 58 | 13.30 | 6.63 | 35.66  |
| 59 | 19.97 | 4.01 | 50.63  |
| 60 | 26.28 | 2.22 | 46.68  |
| 61 | 14.92 | 3.37 | 43.05  |
| 62 | 23.94 | 1.24 | 71.71  |

|    |       |      |       |
|----|-------|------|-------|
| 63 | 15.59 | 1.98 | 59.35 |
| 64 | 20.74 | 1.83 | 70.95 |
| 65 | 22.66 | 1.52 | 94.10 |
| 66 | 21.79 | 2.65 | 33.43 |
| 67 | 28.86 | 1.80 | 34.87 |
| 68 | 21.56 | 1.99 | 28.64 |
| 69 | 19.35 | 3.96 | 32.67 |
| 70 | 8.23  | 6.19 | 21.67 |
| 71 | 11.51 | 3.09 | 20.57 |
| 72 | 17.23 | 3.51 | 21.67 |
| 73 | 22.13 | 2.53 | 34.34 |
| 74 | 26.10 | 1.37 | 61.99 |
| 75 | 23.02 | 1.81 | 42.53 |
| 76 | 27.90 | 1.69 | 74.72 |
| 77 | 23.54 | 3.07 | 46.96 |
| 78 | 17.03 | 3.60 | 31.44 |
| 79 | 22.07 | 2.84 | 51.02 |
| 80 | 18.76 | 3.30 | 54.58 |
| 81 | 26.86 | 1.99 | 52.25 |
| 82 | 15.09 | 3.96 | 27.22 |
| 83 | 16.80 | 3.32 | 57.87 |

**Table S9.** Anova table of growth ring parameter and physical and mechanical properties

|               | MOE | MOR | IBS | UTS |
|---------------|-----|-----|-----|-----|
| RW            | *** | **  | n.s | **  |
| LW percentage | *** | **  | n.s | *** |

where: n.s: $\alpha > 0.05$ , \*:  $\alpha < 0.05$ , \*\*:  $0.05 < \alpha < 0.01$ , \*\*\*:  $0.01 < \alpha < 0.001$ .

**Table S10.** The results of linear fits of impact bending strength of plantation Japanese larch to ring width (w) and latewood percentage (l).

| Properties | Linear fitting equation | R <sup>2</sup> |
|------------|-------------------------|----------------|
| IBS        | $y = -2.08w + 54.90$    | 0.25           |
|            | $y = 0.66l + 34.73$     | 0.56           |
